# Supplementary material
Source: ML conference proceedings conference paper supplement (https://openaccess.thecvf.com/content/CVPRW_2020/html/Wang_Interpreting_Interpretations_Organizing_CVPRW_2020_paper.html)
Supplement: Supplementary file 1 [file Wang_Interpreting_Interpretations_Organizing_CVPRW_2020_supplemental.pdf]

## Appendix

### Appendix I: Proofs

**Nonlinearity** [?] concludes that SM, IG, LRP, DeepLIFT are equivalent for linear models and their proof also applies to SG. We first introduce the following proposition:

**Proposition 1.** *All attribution methods mentioned in Sec ?? except GradCAM and Guided Backpropagation are equivalent if the model behaves linearly.*

*Proof.* As the Proposition 4 and Conclusion 6 in [?] prove that Saliency Map, Integrated Gradient, DeepLIFT and LRP are equivalent for a linear model, we just need to prove SmoothGrad is equivalent to Saliency Map if the model is linear.

If a model behaves linearly, we can express the output score  $y_c$  for class  $c$  as a linear combination such that  $y_c = \mathbf{w}_c^\top \mathbf{x} + b_c$ . Then the SmoothGrad  $S(\mathbf{x})_c$  is

$$\begin{aligned} S(\mathbf{x})_c &= \mathbb{E}_{\epsilon \sim \mathcal{N}(\mathbf{0}, \mathbf{I}\lambda)} \frac{\partial[\mathbf{w}_c^\top (\mathbf{x} + \epsilon) + b_c]}{\partial \mathbf{x}} \\ &= \mathbb{E}_{\epsilon \sim \mathcal{N}(\mathbf{0}, \mathbf{I}\lambda)} \mathbf{w}_c \\ &= \mathbf{w}_c = \frac{\partial y_c}{\partial \mathbf{x}} \quad (\text{Saliency Map}) \end{aligned} \quad (1)$$

□

**Proof to Proposition 4** *If an attribution method A satisfies both sensitivity- $n_1$  and sensitivity- $n_2$ , then  $N_p^k(\mathbf{x}, A) = 0$  under the condition if  $\sum_i^{n_1} s_i = \sum_j^{n_2} s_j = kS(\mathbf{x}, A)$ ,  $s_i \in \pi_A^+(\mathbf{x})$ ,  $s_j \in \hat{\pi}_A^+(\mathbf{x})$ ,  $k \in [0, 1]$ , but not vice versa.*

*Proof.* If A satisfies sensitivity- $n_1$ , for any given ordered subset  $\pi$ , we have

$$\sum_i^{n_1} s_i = R(\mathbf{x}, \pi)$$

Same thing happens to  $n_2$  if A satisfies sensitivity- $n_2$ . Under the condition if  $\sum_i^{n_1} s_i = \sum_j^{n_2} s_j = kS(\mathbf{x}, A)$ ,  $s_i \in \pi_A^+(\mathbf{x})$ ,  $s_j \in \hat{\pi}_A^+(\mathbf{x})$ ,  $k \in [0, 1]$ ,

$$\begin{aligned} N_p^k(\mathbf{x}, A) &= |R(\mathbf{x}, \pi_A(\mathbf{x})) - R(\mathbf{x}, \pi_A^+(\mathbf{x}))| \\ &= \left| \sum_i^{n_1} s_i - \sum_j^{n_2} s_j \right| \\ &= |kS(\mathbf{x}, A) - kS(\mathbf{x}, A)| = 0 \end{aligned} \quad (2)$$

□

## Appendix II: Implementation Details

### Models

We evaluate N\_Ord, S\_Ord for all attribution methods mentioned in Section ???. We evaluate on 9600 images from ImageNet [?] with pre-trained on VGG16[?].

### Attribution Methods

#### Saliency Map

As discussed in Sec ??, we use  $\text{grad} \times \text{input}$  to represent the Saliency Map, instead of the vanilla gradient.

#### Integrated Gradient

We use the black image as the baseline for all images and we use the 50 samples on the linear path from the baseline to the input.

#### Smooth Gradient

As discussed in Sec ??, we use  $\text{smooth\_grad} \times \text{input}$  to represent the Smooth Gradient. We pick a noise level of 20 % as it appears to be the best parameter in its original paper [?]. We randomly sample 50 points from the Gaussian distribution for the aggregation.

#### DeepLIFT

We use the black image as the baseline for all images and we use the RevealCancel rule for DeepLIFT<sup>1</sup>

#### LRP

We use the implementation of LRP- $\alpha 2\beta 1$  with generalization tricks mentioned by [?] who argues this rule is better for image explanations.

#### Guided Backpropagation

To implement Guided Backpropagation, we modify the ReLU activation in the network to filter out the negative gradient in tensorflow.

---

```
@ops.RegisterGradient("GuidedBackProp")
def _GuidedBackProp(op, grad):
    dtype = op.inputs[0].dtype
    return grad * tf.cast(grad > 0.,
                           dtype) * \
           tf.cast(op.inputs[0] > 0.,
                   dtype)
```

---

#### GradCAM

We use the last convolutional layer to compute the GradCAM for all images.

## Appendix III

More examples of evaluating each images with TPN and TPS are shown in Fig 1

<sup>1</sup>We use the release code on <https://github.com/kundajelab/deeplift>

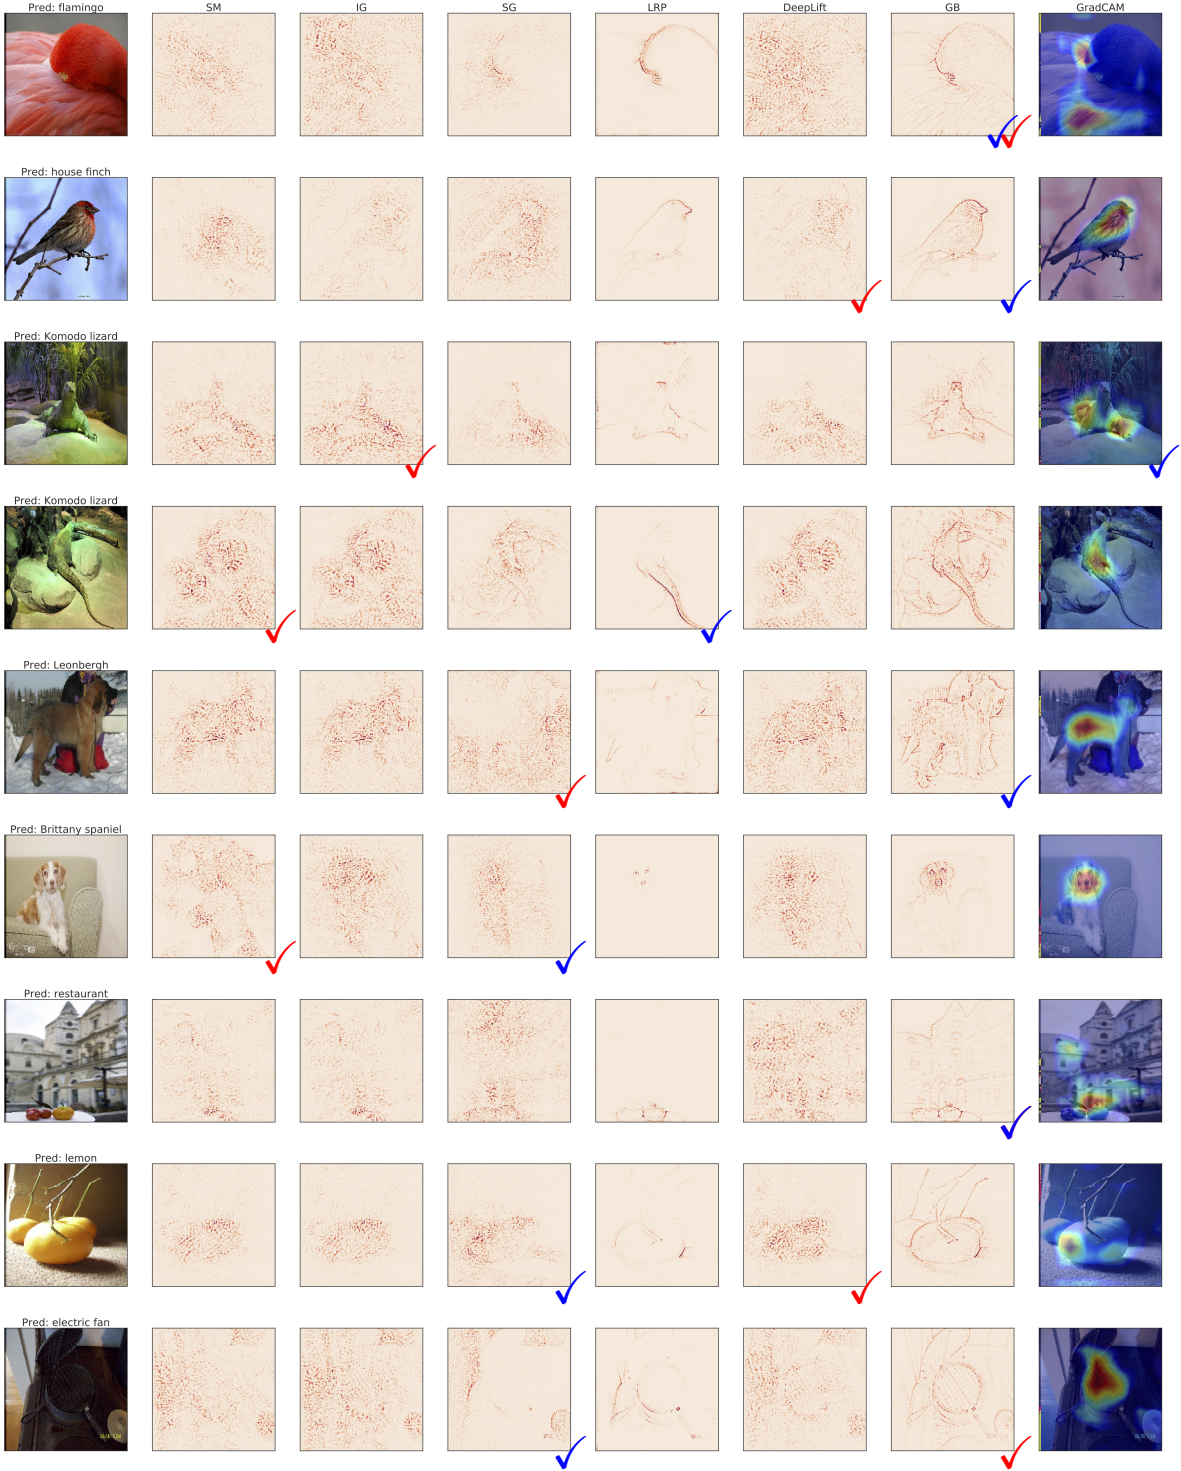

Figure 1. More visualizations of different attribution methods. Red checks mark the winner of Total Proportionality for Necessity and blue checks mark the winner of Total Proportionality for Sufficiency
